# Supplementary material for: Tumor heterogeneity and acquired drug resistance in FGFR2-fusion-positive cholangiocarcinoma through rapid research autopsy
Source: PubMed Central journal article supplement (PMC6672025; doi:10.1101/mcs.a004002), 2019-08
Supplement: supp_mcs.a004002_Supplemental_Figure1.pdf [file supp_mcs.a004002_Supplemental_Figure1.pdf]

A

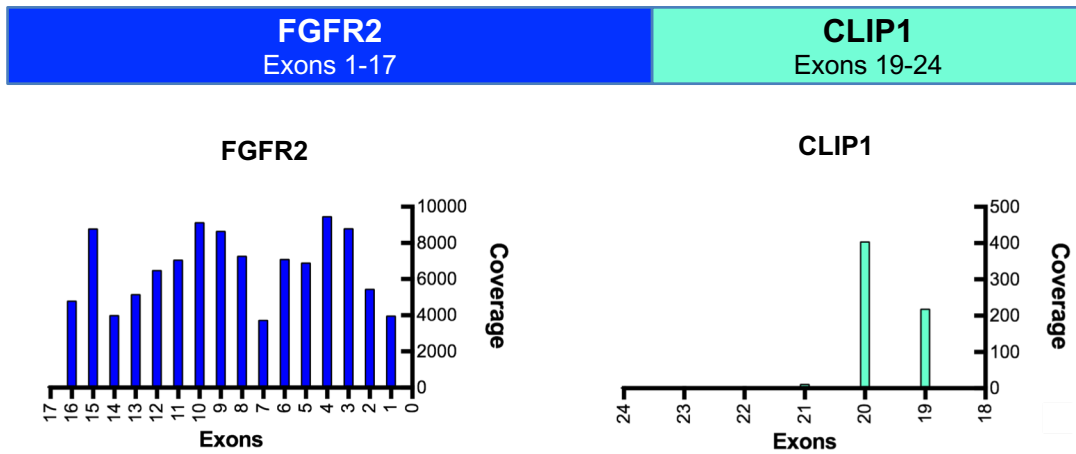

B

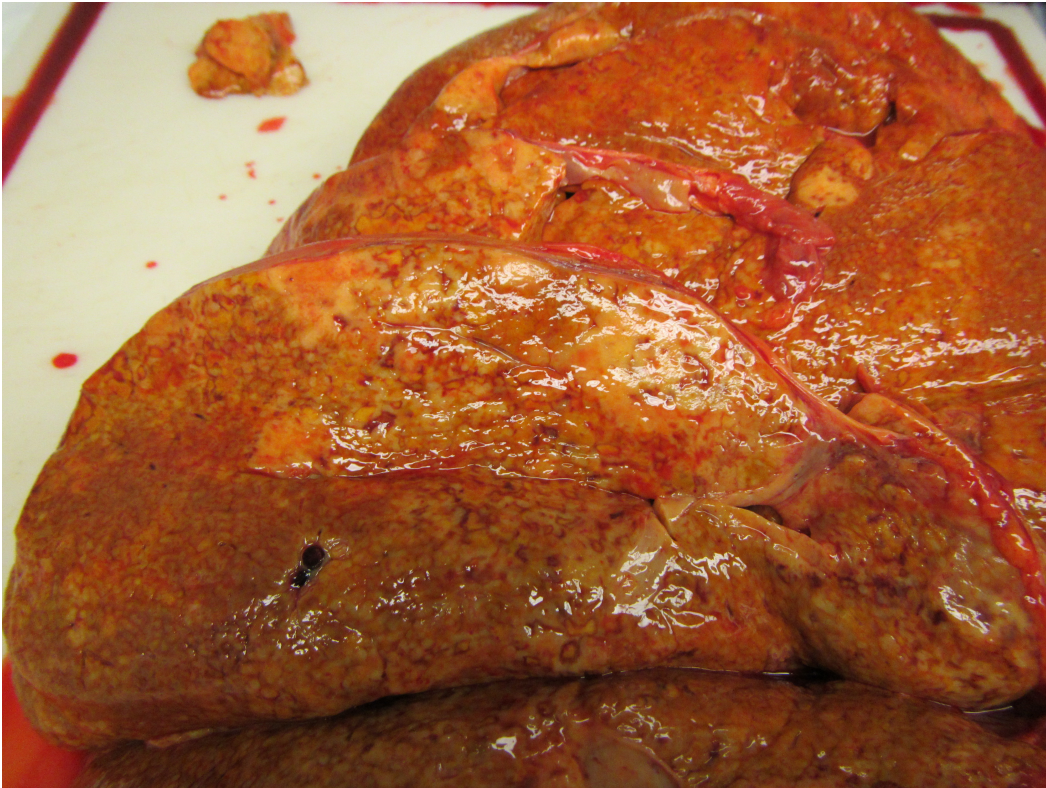

**Supplemental Figure 1. Coverage of novel FGFR2 fusion detected and gross liver image.** A. A novel fusion containing exons 1-17 of *FGFR2* and exons 19-24 of *CLIP1* was detected in a patient with cholangiocarcinoma. Bar graphs represent average exon read depth for *FGFR2* and *CLIP1* exons. B. Gross image of the liver at the time of autopsy.
