# Supplementary material for: Tumor heterogeneity and acquired drug resistance in FGFR2-fusion-positive cholangiocarcinoma through rapid research autopsy
Source: PubMed Central journal article supplement (PMC6672025; doi:10.1101/mcs.a004002), 2019-08
Supplement: supp_mcs.a004002_Supplemental_Figure2.pdf [file supp_mcs.a004002_Supplemental_Figure2.pdf]

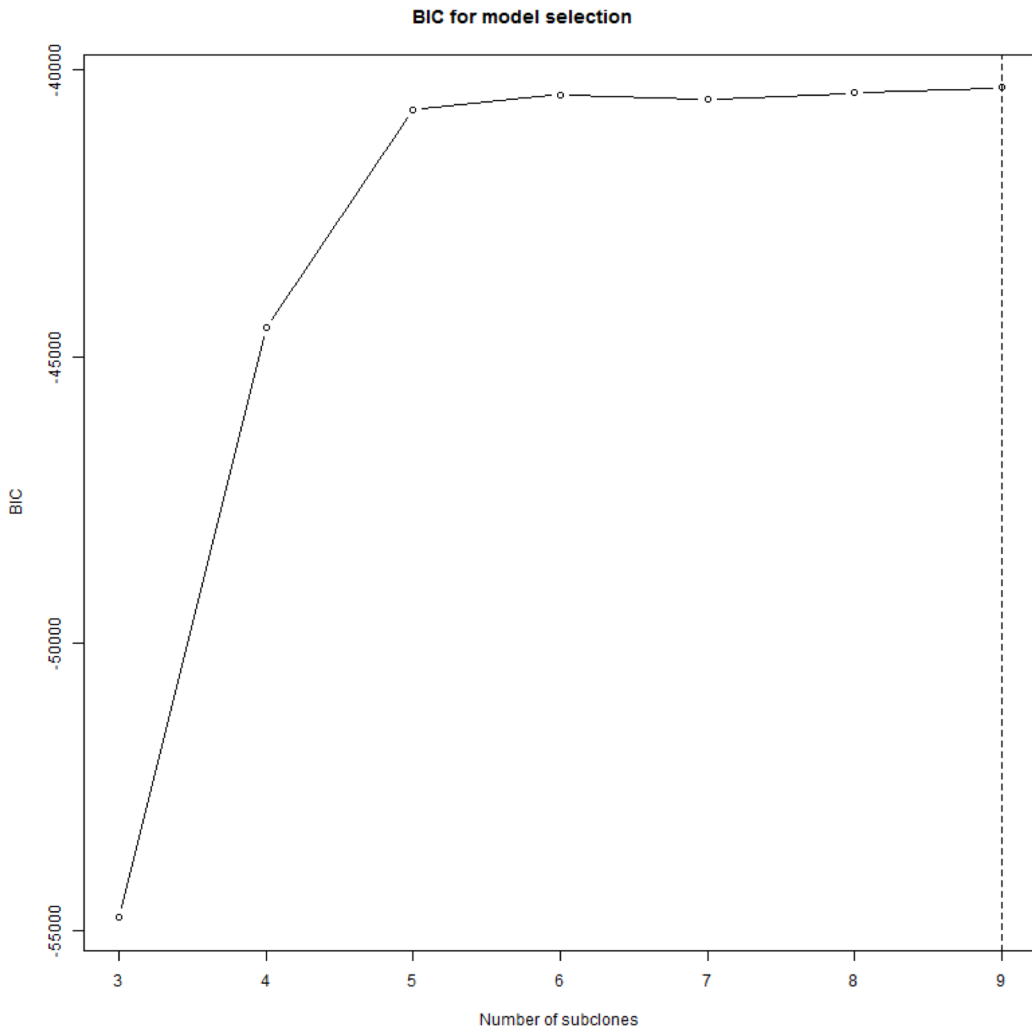

**Supplemental Figure 2. BIC score of subclonal models with 3-9 clonal populations.** Models with 3 to 9 clonal populations were tested by Canopy. A five-population model was selected (BIC=-40684.12), as higher-complexity models did not yield substantially higher BIC (maximal BIC=-40301.74 with 9 clonal populations). Note that germline is considered a clonal population by Canopy; therefore the selected model contains four tumor subclones.
