# Supplementary material for: Tumor heterogeneity and acquired drug resistance in FGFR2-fusion-positive cholangiocarcinoma through rapid research autopsy
Source: PubMed Central journal article supplement (PMC6672025; doi:10.1101/mcs.a004002), 2019-08
Supplement: supp_mcs.a004002_Supplemental_Table1.pdf [file supp_mcs.a004002_Supplemental_Table1.pdf]

| Sample                     | Percent Mutant |
|----------------------------|----------------|
| Negative Control           | 0%             |
| Positive Control           | 95%            |
| Pre Treatment              | 0%             |
| Post Progression           | 0%             |
| Liver #1                   | 17.60%         |
| Liver #2                   | 0.30%          |
| Liver #3                   | 0.14%          |
| Liver #4                   | 0%             |
| Liver #5                   | 0%             |
| Liver #6                   | 0%             |
| Aorta/esophagus Lymph node | 0%             |
| Right Kidney Lymph node    | 0%             |
| Left Kidney Lymph node     | 0%             |

**Supplemental Table 1. ddPCR for FGFR2 N549H Mutation.** Droplet digital PCR (ddPCR) results for percentage of mutant present in samples.
